# Supplementary material for: Regional influence of wildfires on aerosol chemistry in the western US and insights into atmospheric aging of biomass burning organic aerosol
Source: Copernicus journal article supplement (doi:10.5194/acp-17-2477-2017), 2017-02-16
Supplement: Supplementary file [file acp-17-2477-2017-supplement.pdf]

Supplement of Atmos. Chem. Phys., 17, 2477–2493, 2017  
<http://www.atmos-chem-phys.net/17/2477/2017/>  
doi:10.5194/acp-17-2477-2017-supplement  
© Author(s) 2017. CC Attribution 3.0 License.

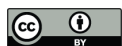

Atmospheric  
Chemistry  
and Physics  
Open Access  
EGU

*Supplement of*

## **Regional influence of wildfires on aerosol chemistry in the western US and insights into atmospheric aging of biomass burning organic aerosol**

**Shan Zhou et al.**

*Correspondence to:* Qi Zhang (dkwzhang@ucdavis.edu)

The copyright of individual parts of the supplement might differ from the CC-BY 3.0 licence.

18 **Section 1. PMF analysis**

19 PMF is commonly applied to the organic mass spectral matrix to determine distinct OA factors (Zhang et al.,  
20 2011 and references therein), but conducting PMF analysis on the combined spectra of organic and inorganic  
21 aerosols allows for the deriving of additional information. In this study, we performed PMF analysis under various  
22 conditions, i.e., on organic matrix only and combined aerosol matrix for the entire sampling period, BB impacted  
23 periods, and clean periods without BB influence, respectively. PMF analysis on the organic matrix for “No BB”  
24 periods resolved two types of oxygenated OA (OOA) – an intermediately oxidized OOA associated with boundary  
25 layer (BL) dynamics and a highly oxidized one that correlated with sulfate and appeared to represent free  
26 tropospheric air masses. However, PMF analysis on the organic matrix for the entire study period was unsuccessful  
27 at retrieving two meaningful OOA factors. A minimum of 5 factors is needed to adequately account for the observed  
28 variance but the 5-factor solution resolved only one OOA and four other factors that appeared to represent BBOAs.  
29 However, there are indications of splitting and mixing among factors for this solution. The 6-factor solution led to  
30 further splitting and mixing of the BBOA factors without being able to resolve two meaningful OOAs. In contrast,  
31 performing PMF on the combined inorganic and organic matrix allowed the model to resolve a highly-oxidized  
32 background OOA factor associated with ammonium sulfate, an intermediately oxidized background OOA factor  
33 driven by BL dynamics, and three distinct BBOA factors for the 5-factor solution. In addition, the solutions of the  
34 combined matrix provide information on the distributions of inorganic signals among different factors and the  
35 association between inorganic and organic aerosol components in each factor. This information is helpful for  
36 interpreting the sources, chemical characteristics, and evolution processes of OA (Sun et al., 2012).

37 **Table S1.** The average ( $\pm 1\sigma$ ) value of measured aerosol and gas phase parameters for three aerosol regimes.

|                                      | "No BB" |            | "BB Infl" |            | "BB Plm" |            |
|--------------------------------------|---------|------------|-----------|------------|----------|------------|
|                                      | Mean    | 1 $\sigma$ | Mean      | 1 $\sigma$ | Mean     | 1 $\sigma$ |
| $f_{60}$                             | 0.18%   | 0.1%       | 0.43%     | 0.05%      | 0.77%    | 0.29%      |
| CO <sup>c</sup>                      | 87.8    | 17.9       | 121.4     | 24.8       | 178.3    | 68.8       |
| NR-PM <sub>1</sub> <sup>a</sup>      | 3.66    | 4.22       | 13.42     | 7.15       | 25.67    | 19.89      |
| Organics <sup>a</sup>                | 3.11    | 3.69       | 12.40     | 6.71       | 24.30    | 18.95      |
| Sulfate <sup>a</sup>                 | 0.42    | 0.37       | 0.61      | 0.20       | 0.62     | 0.22       |
| Nitrate <sup>a</sup>                 | 0.03    | 0.03       | 0.15      | 0.12       | 0.35     | 0.47       |
| Ammonium <sup>a</sup>                | 0.10    | 0.12       | 0.25      | 0.11       | 0.38     | 0.23       |
| Chloride <sup>a</sup>                | 0.006   | 0.003      | 0.012     | 0.018      | 0.018    | 0.021      |
| $\sigma_{550\text{nm}}$ <sup>b</sup> | 6.7     | 8.0        | 32.7      | 19.3       | 88.3     | 74.1       |
| NO <sup>c</sup>                      | 0.012   | 0.01       | 0.017     | 0.02       | 0.019    | 0.02       |
| NO <sub>2</sub> <sup>c</sup>         | 0.13    | 0.04       | 0.17      | 0.06       | 0.14     | 0.07       |
| PAN <sup>c</sup>                     | 0.08    | 0.05       | 0.23      | 0.06       | 0.36     | 0.07       |
| NO <sub>y</sub> <sup>c</sup>         | 0.44    | 0.07       | 0.75      | 0.08       | 1.03     | 0.22       |
| O <sub>3</sub> <sup>c</sup>          | 44.7    | 0.23       | 49.7      | 0.21       | 47.3     | 0.51       |

38 <sup>a</sup>  $\mu\text{g m}^{-3}$ .  
39 <sup>b</sup>  $\text{Mm}^{-1}$   
40 <sup>c</sup> ppbv

41 **Table S2.** Correlation Coefficient ( $r^2$ ) between tracers and the total BBOA (= BBOA-1 + BBOA-2 + BBOA-3), as  
 42 well as each OA factor.

| Variables                                                 | BBOA   | BBOA-1 | BBOA-2 | BBOA-3 | BL-OOA | LV-OOA |
|-----------------------------------------------------------|--------|--------|--------|--------|--------|--------|
| BBOA                                                      | 1      |        |        |        |        |        |
| BBOA-1                                                    | 0.84   | 1      |        |        |        |        |
| BBOA-2                                                    | 0.84   | 0.54   | 1      |        |        |        |
| BBOA-3                                                    | 0.91   | 0.59   | 0.80   | 1      |        |        |
| BL-OOA                                                    | 0.07   | 0.03   | 0.06   | 0.10   | 1      |        |
| LV-OOA                                                    | 0.06   | 0.06   | 0.03   | 0.07   | 0.02   | 1      |
| Organics                                                  | 0.98   | 0.79   | 0.83   | 0.90   | 0.16   | 0.04   |
| Sulfate                                                   | < 0.01 | < 0.01 | 0.01   | 0.01   | 0.08   | 0.66   |
| Nitrate                                                   | 0.47   | 0.60   | 0.33   | 0.28   | < 0.01 | 0.02   |
| Ammonium                                                  | 0.63   | 0.51   | 0.57   | 0.56   | 0.07   | 0.12   |
| Chloride                                                  | 0.25   | 0.33   | 0.18   | 0.14   | 0.01   | 0.01   |
| C <sub>2</sub> H <sub>3</sub> O <sup>+</sup>              | 0.93   | 0.70   | 0.87   | 0.87   | 0.22   | 0.03   |
| CO <sub>2</sub> <sup>+</sup>                              | 0.87   | 0.57   | 0.79   | 0.95   | 0.21   | 0.02   |
| CHO <sub>2</sub> <sup>+</sup>                             | 0.93   | 0.67   | 0.91   | 0.90   | 0.15   | 0.01   |
| C <sub>4</sub> H <sub>9</sub> <sup>+</sup>                | 0.94   | 0.95   | 0.71   | 0.75   | 0.06   | 0.07   |
| C <sub>2</sub> H <sub>4</sub> O <sub>2</sub> <sup>+</sup> | 0.86   | 0.94   | 0.65   | 0.62   | 0.03   | 0.04   |
| C <sub>3</sub> H <sub>5</sub> O <sub>2</sub> <sup>+</sup> | 0.95   | 0.92   | 0.78   | 0.76   | 0.05   | 0.05   |
| CH <sub>3</sub> SO <sub>2</sub> <sup>+</sup>              | 0.34   | 0.22   | 0.31   | 0.38   | 0.47   | 0.02   |
| CO                                                        | 0.89   | 0.70   | 0.73   | 0.86   | 0.09   | 0.08   |
| $\sigma_{550\text{nm}}$                                   | 0.93   | 0.77   | 0.74   | 0.90   | 0.08   | 0.09   |
| NO                                                        | 0.04   | 0.02   | 0.06   | 0.04   | 0.04   | 0.01   |
| NO <sub>2</sub>                                           | < 0.01 | < 0.01 | 0.01   | < 0.01 | 0.04   | 0.07   |
| NO <sub>x</sub>                                           | < 0.01 | < 0.01 | < 0.01 | < 0.01 | 0.06   | 0.05   |
| NO <sub>y</sub>                                           | 0.75   | 0.67   | 0.59   | 0.66   | 0.09   | < 0.01 |
| PAN                                                       | 0.60   | 0.48   | 0.49   | 0.59   | 0.02   | 0.01   |

43

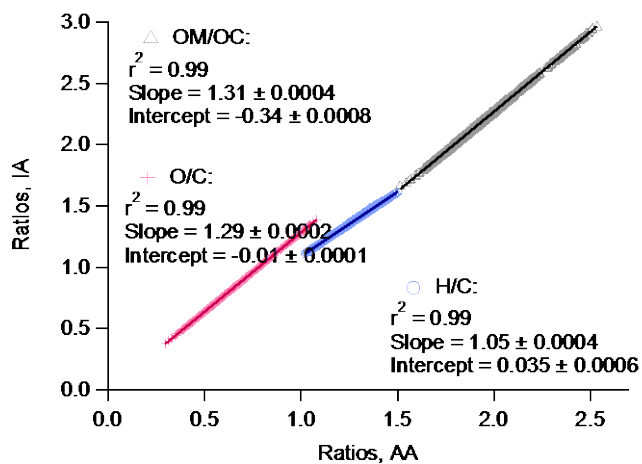

44  
 45 **Fig. S1.** Scatter plot of OM/OC, O/C, and H/C calculated with the Improved Ambient (IA) method vs. that with  
 46 the Aiken-Ambient (AA) method. Data fitting was performed using the orthogonal distance regression (ODR).

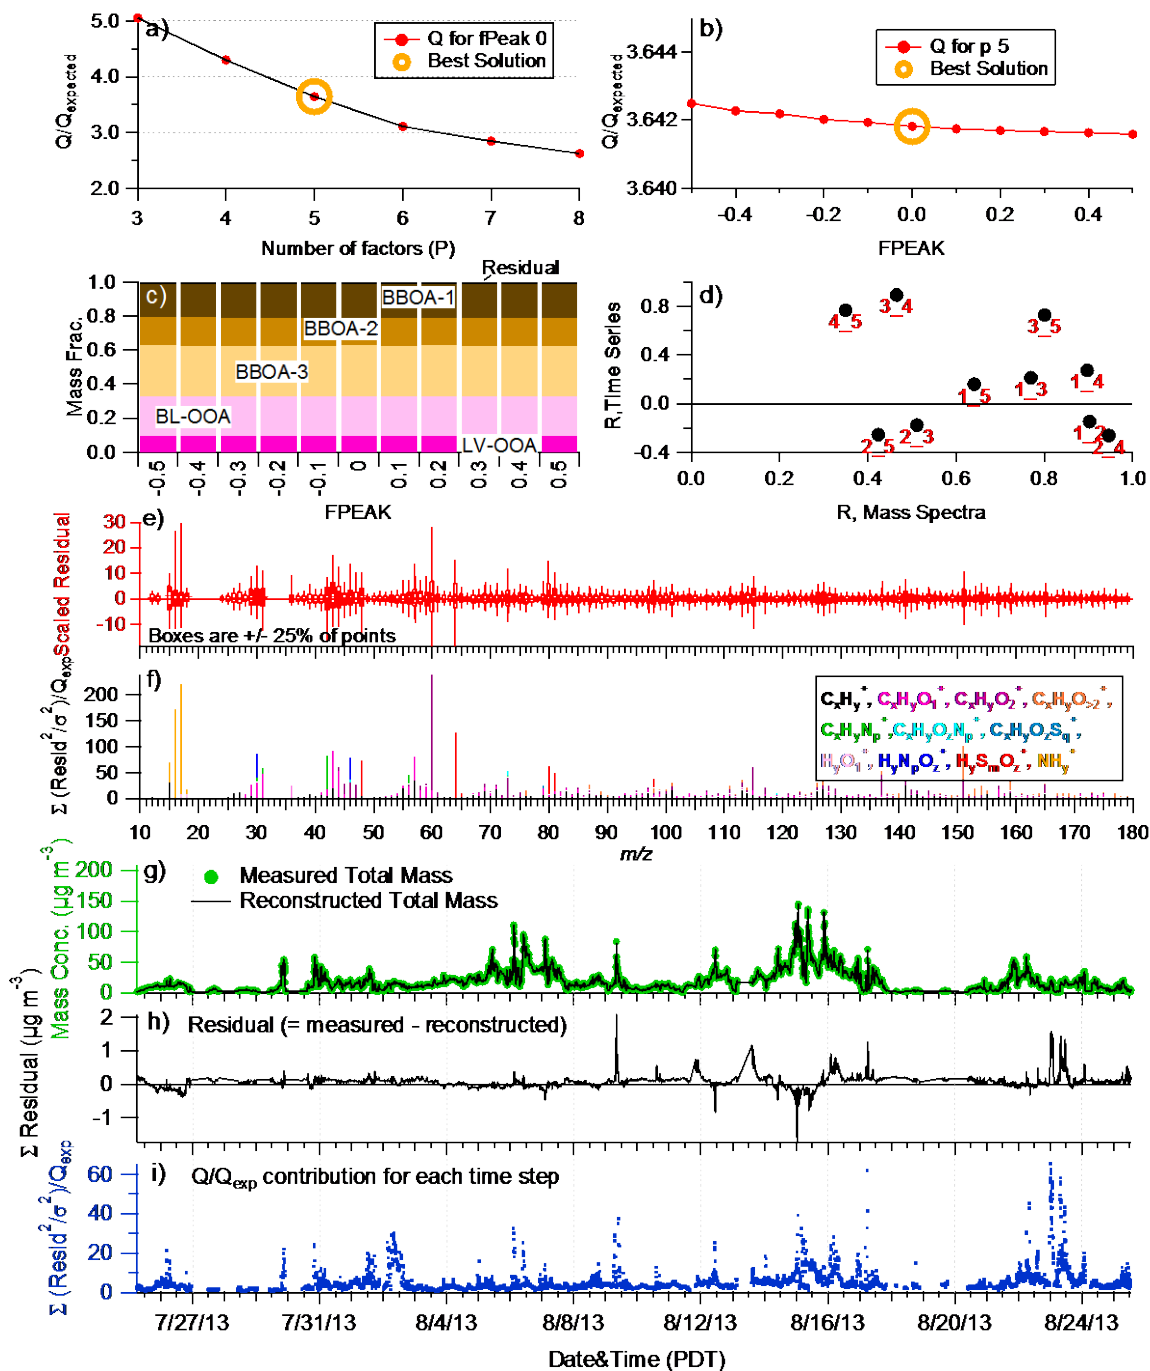

47  
 48 **Fig. S2.** Summary of the evaluation of the PMF results for the 5-factor solution: (a)  $Q/Q_{\text{exp}}$  as a function of  
 49 number of factors (P), (b)  $Q/Q_{\text{exp}}$  as a function of fPeak values, (c) fractions of PMF factors as a function of fPeak  
 50 values, (d) correlation between the 5 factors in terms of mass spectrum and time series (1: BL-OOA, 2: LV-OOA, 3:  
 51 BBOA-2, 4: BBOA-3, 5: BBOA-1), (e) box plot of the scaled residuals for each ion, (f)  $Q/Q_{\text{exp}}$  values for each ion,  
 52 (g) time series of the measured NR-PM<sub>1</sub> mass concentration and the reconstructed mass, (h) Residual time series,  
 53 and (i)  $Q/Q_{\text{exp}}$  time series.

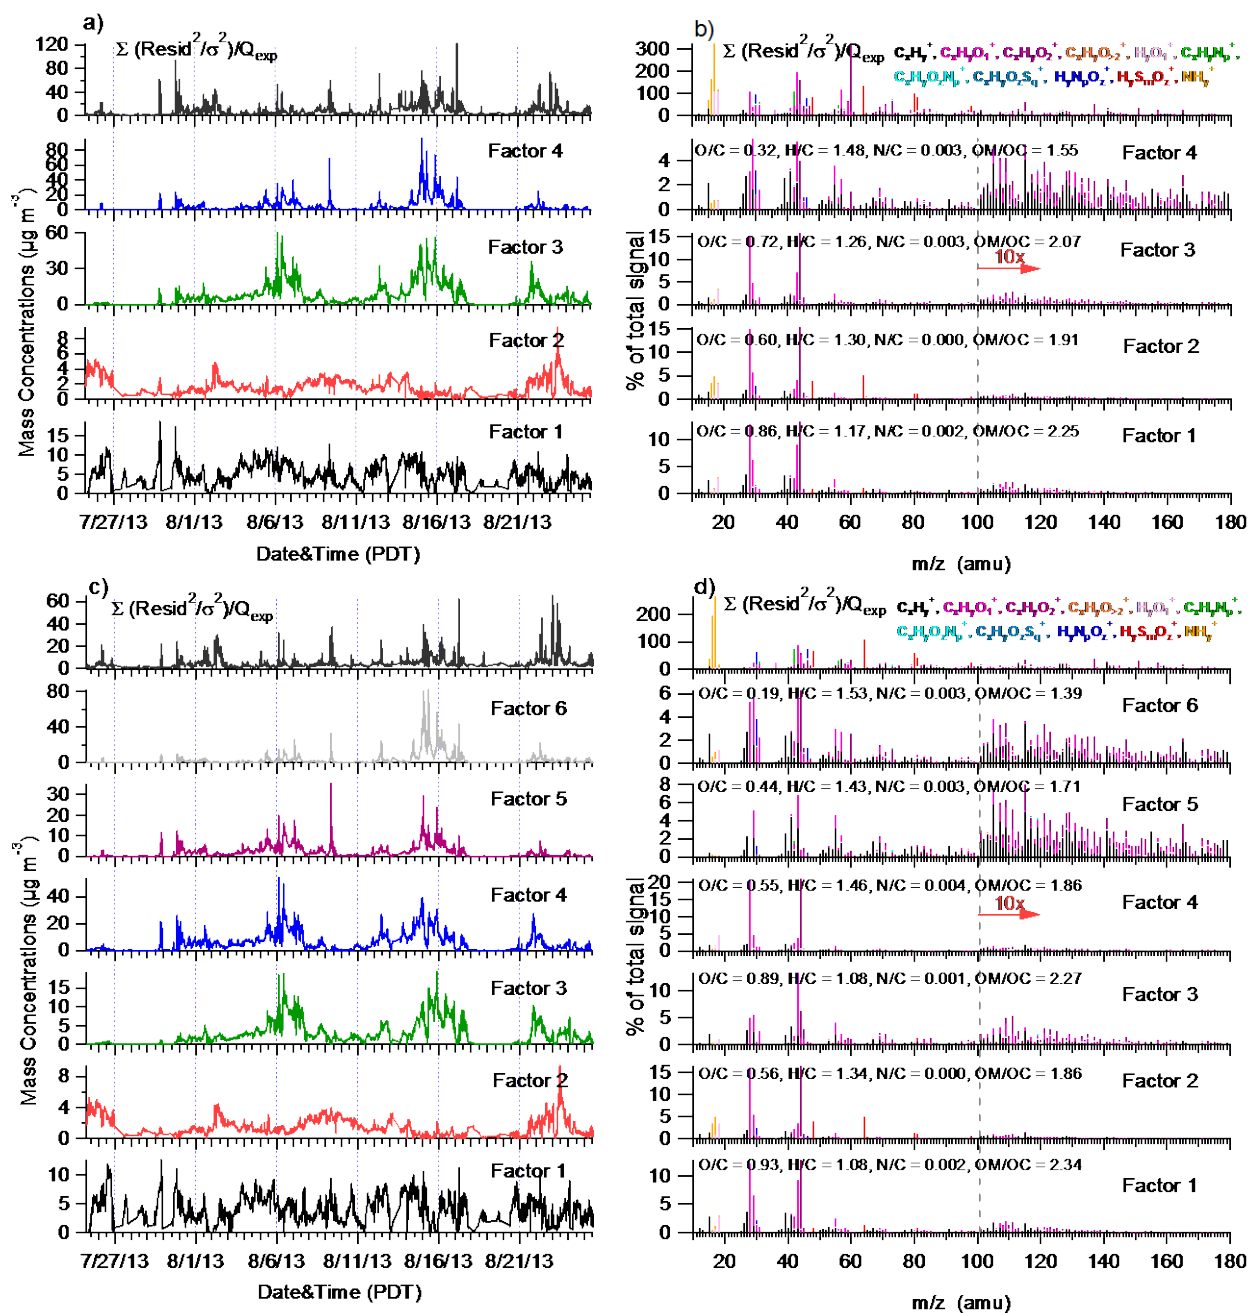

54

55 **Fig. S3.** The time series and mass spectral profile of total  $Q/Q_{\text{exp}}$  and each OA factor for the 4-factor (a, b) and 6-

56 factor (c, d) solution.

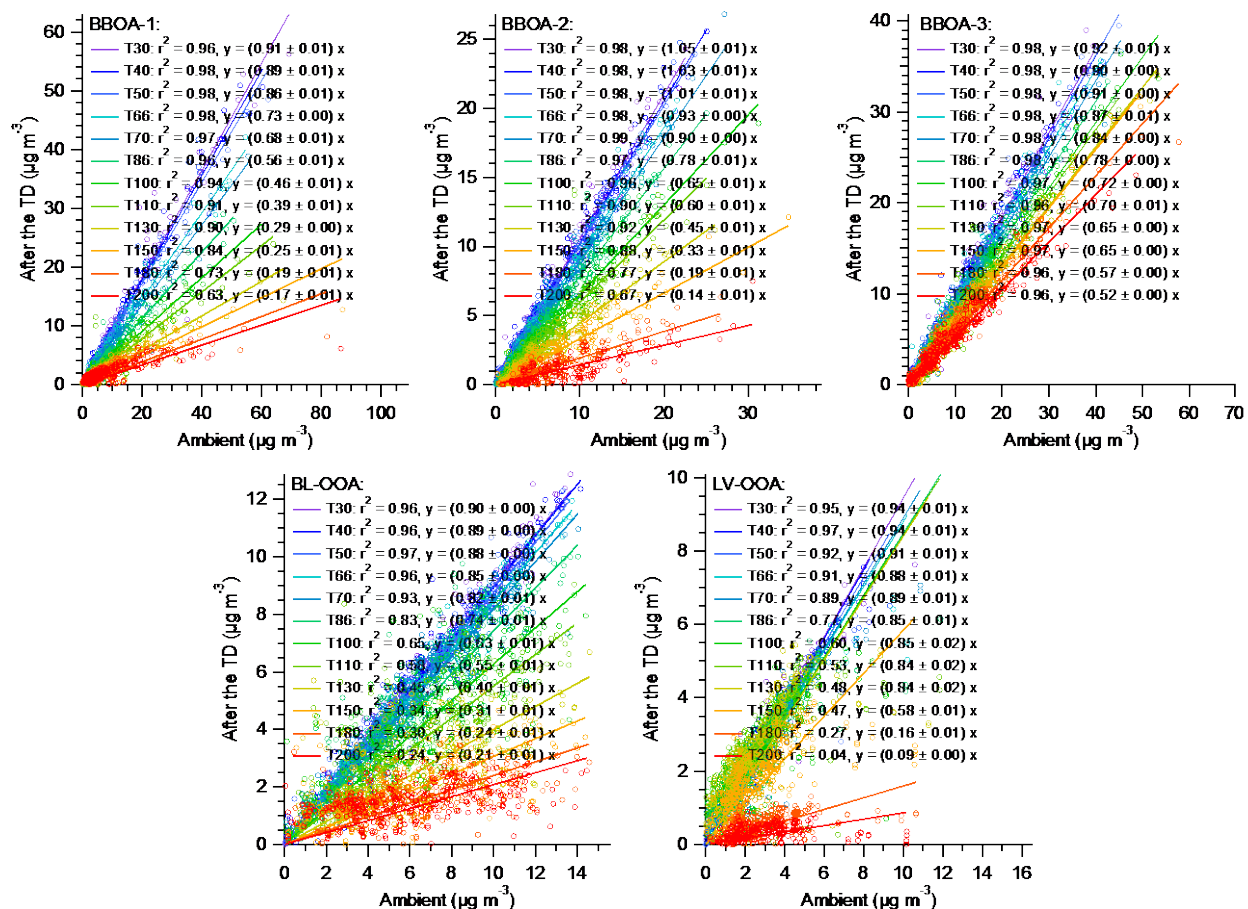

57  
 58 **Fig. S4.** Scatter plots of data after the TD vs. ambient for OA factors. Data fitting was performed using the  
 59 orthogonal distance regression (ODR) forced through origin.



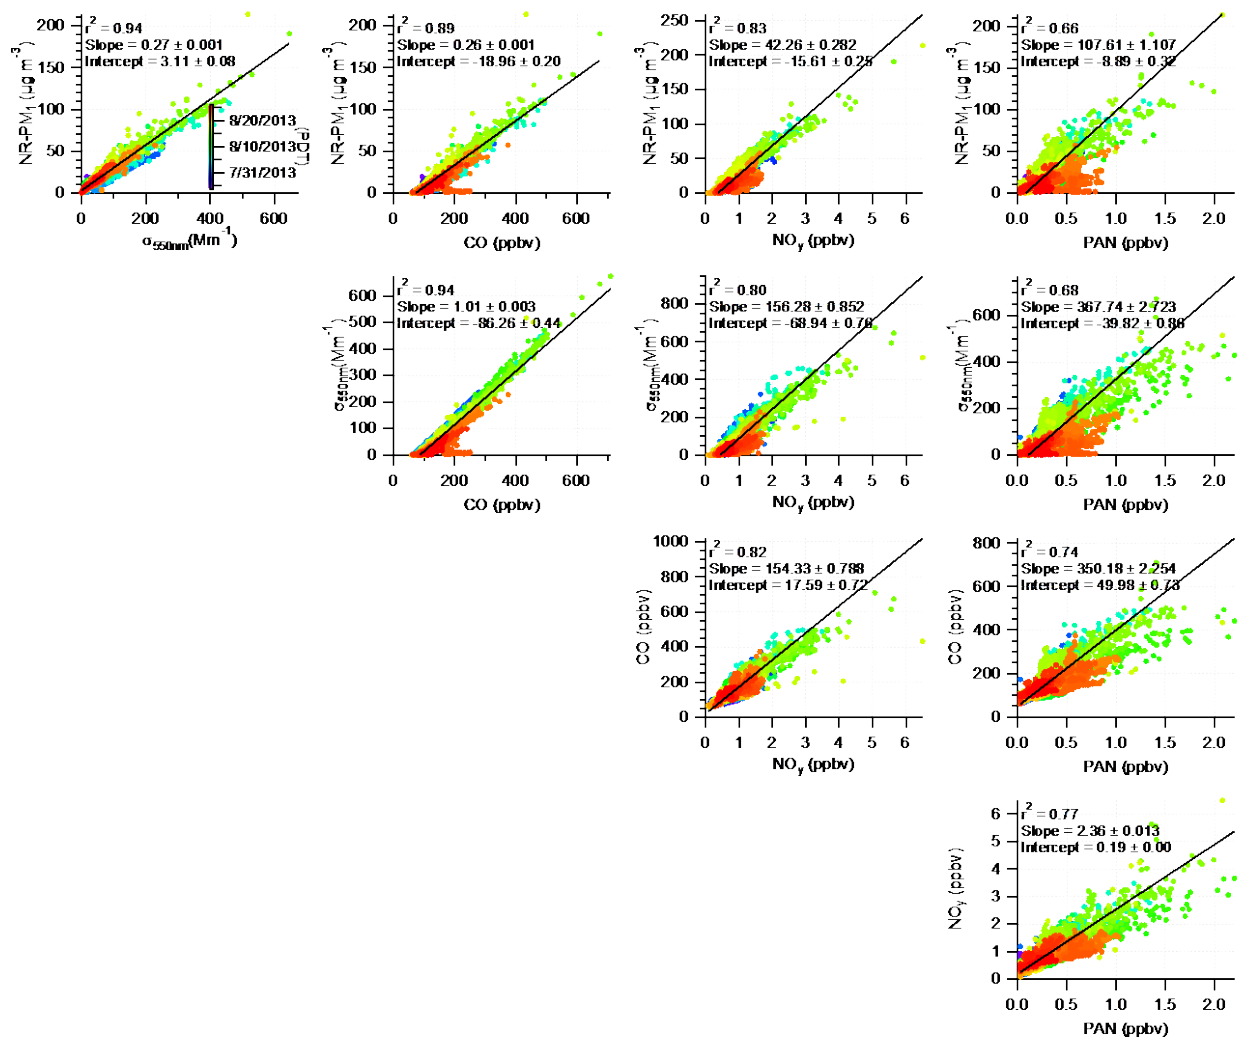

60

61 **Fig. S5.** Scatter plots of the cross correlations between NR-PM<sub>1</sub>,  $\sigma_{550\text{nm}}$ , CO, NO<sub>y</sub>, and PAN, colored by time.

62 Data fitting was performed using the orthogonal distance regression (ODR).

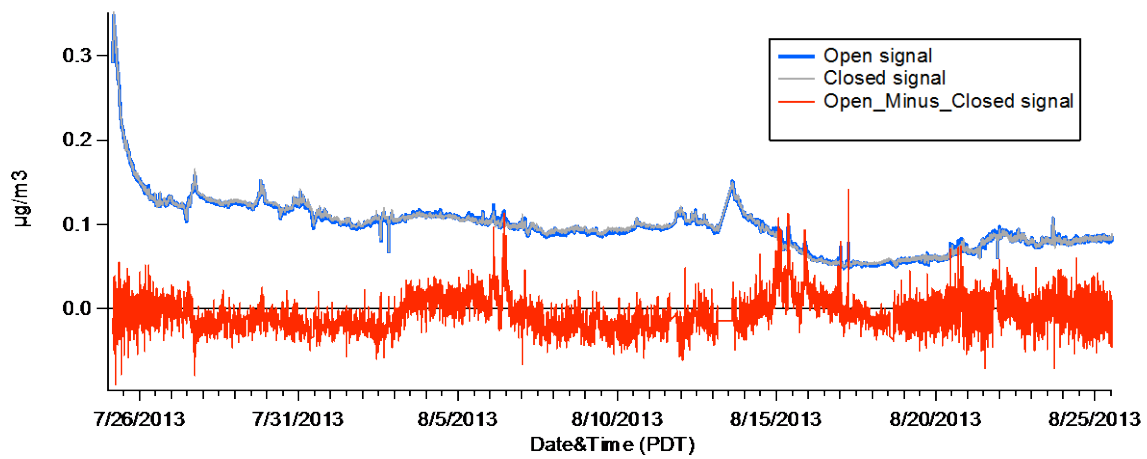

63

64

**Fig. S6.** Time series of  $K^+$  measured by the HR-AMS in different chopper positions.

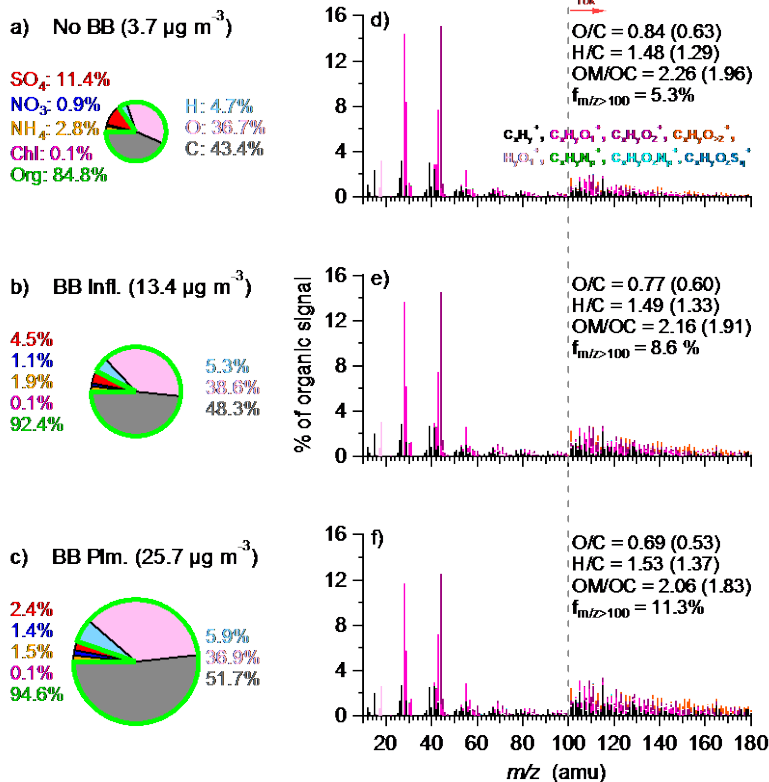

65  
 66 **Fig. S7.** The average NR-PM<sub>1</sub> composition (a-c) and OA HRMS (d-f) colored by eight ion families (i.e.,  $\text{C}_x\text{H}_y^+$ ,  
 67  $\text{C}_x\text{H}_y\text{O}_1^+$ ,  $\text{C}_x\text{H}_y\text{O}_2^+$ ,  $\text{C}_x\text{H}_y\text{O}_2\text{N}^+$ ,  $\text{H}_y\text{O}_1^+$ ,  $\text{C}_x\text{H}_y\text{N}_p^+$ ,  $\text{C}_x\text{H}_y\text{O}_z\text{N}_p^+$ , and  $\text{C}_x\text{H}_y\text{O}_z\text{S}_q^+$ ), for "No BB" (a and d), "BB Infl" (b  
 68 and e), and "BB Plm" regimes (c and f), respectively. Organic portion in the pie charts are colored by four elements  
 69 (i.e., C, O, H, and N). Numbers for in the pie charts corresponds to the mass fractional contribution of each species  
 70 and element to total NR-PM<sub>1</sub> mass. The elemental ratios calculated with the IA method are shown in the legends of  
 71 with those obtained using the AA method in parenthesis.

72

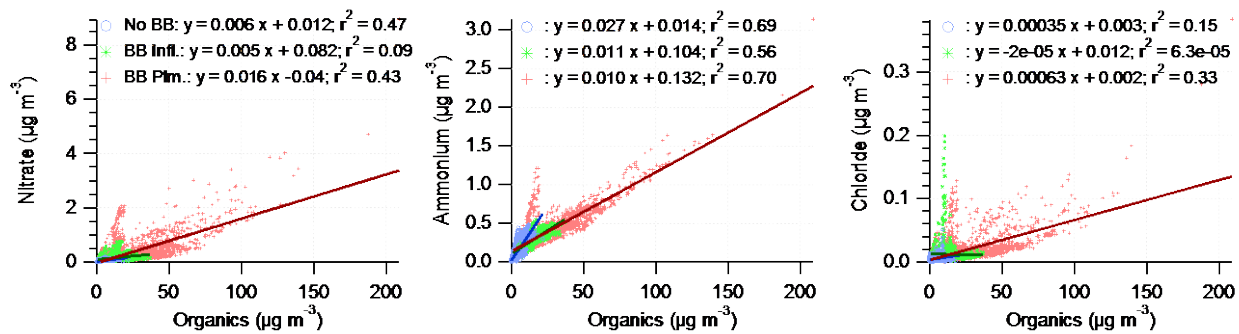

73

74 **Fig. S8.** Scatter plots of nitrate, ammonium, and chloride vs. organics for “No BB”, “BB Infl”, and “BB Plm”

75 regimes, respectively. Data fitting was performed using the orthogonal distance regression (ODR).

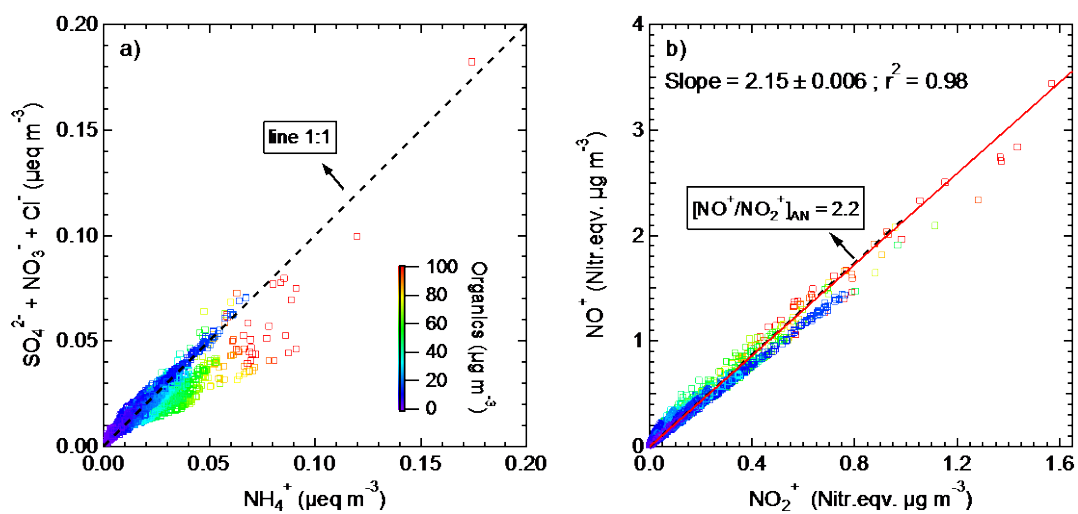

76  
 77 **Fig. S9.** Scatter plots of (a) the sum of all anion concentration (sulfate + nitrate + chloride) vs. cation concentration  
 78 (ammonium) and (b)  $\text{NO}^+$  vs.  $\text{NO}_2^+$  for data with  $f_{60} > 0.3\%$  (i.e., “BB Infl” and “BB Plm” periods) colored by  
 79 organic mass concentration. Data fitting in (b) was performed using the orthogonal distance regression (ODR)  
 80 forced through origin.

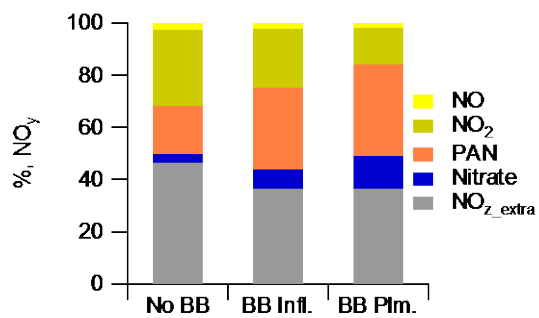

81  
 82 **Fig. S10.** The mass fractional contribution of nitrogen species (i.e., gas phase NO,  $\text{NO}_2$ , PAN, particle phase nitrate,  
 83 and the rest  $\text{NO}_z$  ( $\text{NO}_{z\_extra} = \text{NO}_y - (\text{NO} + \text{NO}_2 + \text{PAN} + \text{nitrate})$ ) to total  $\text{NO}_y$  for the three regimes.

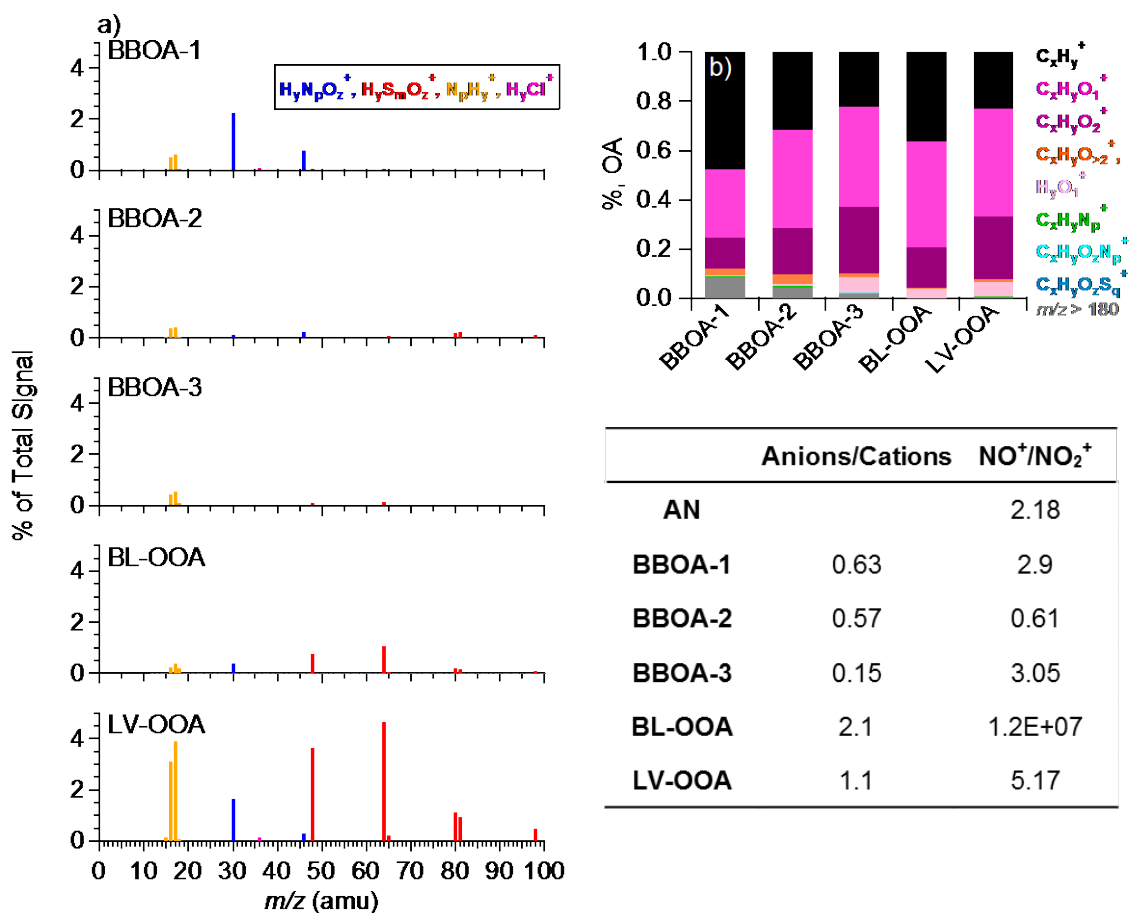

84  
 85 **Fig. S11.** (a) HRMS of inorganics and (b) OA composition colored by eight ion families and signal at  $m/z > 180$   
 86 for each PMF factor. Table summarized the ratios of the molar equivalent of the sum of HR-AMS measured anionic  
 87 species, i.e., sulfate, nitrate and chloride, to that of the cation species, ammonium (Anions/Cations) and  $NO^+$  to  
 88  $NO_2^+$  for pure ammonium nitrate (AN) and each PMF factor.

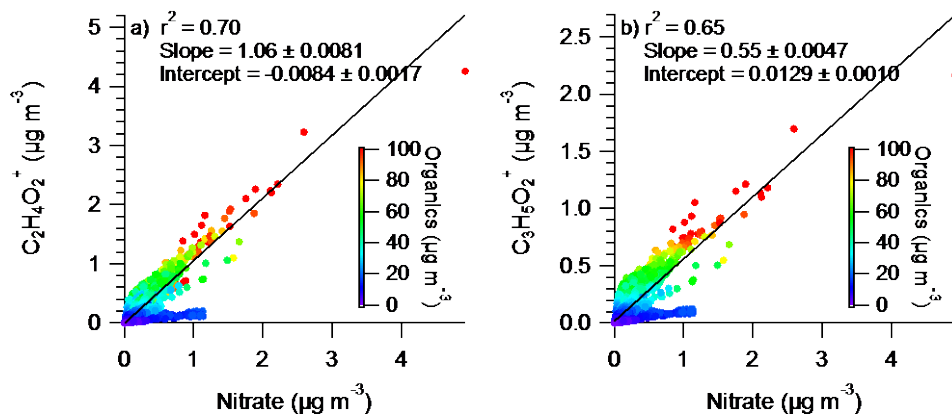

89

90 **Fig. S12.** Scatter plots of (a)  $\text{C}_2\text{H}_4\text{O}_2^+$  and (b)  $\text{C}_3\text{H}_5\text{O}_2^+$  versus nitrate, colored by organic mass concentrations.

91 Data fitting was performed using the orthogonal distance regression (ODR).

92



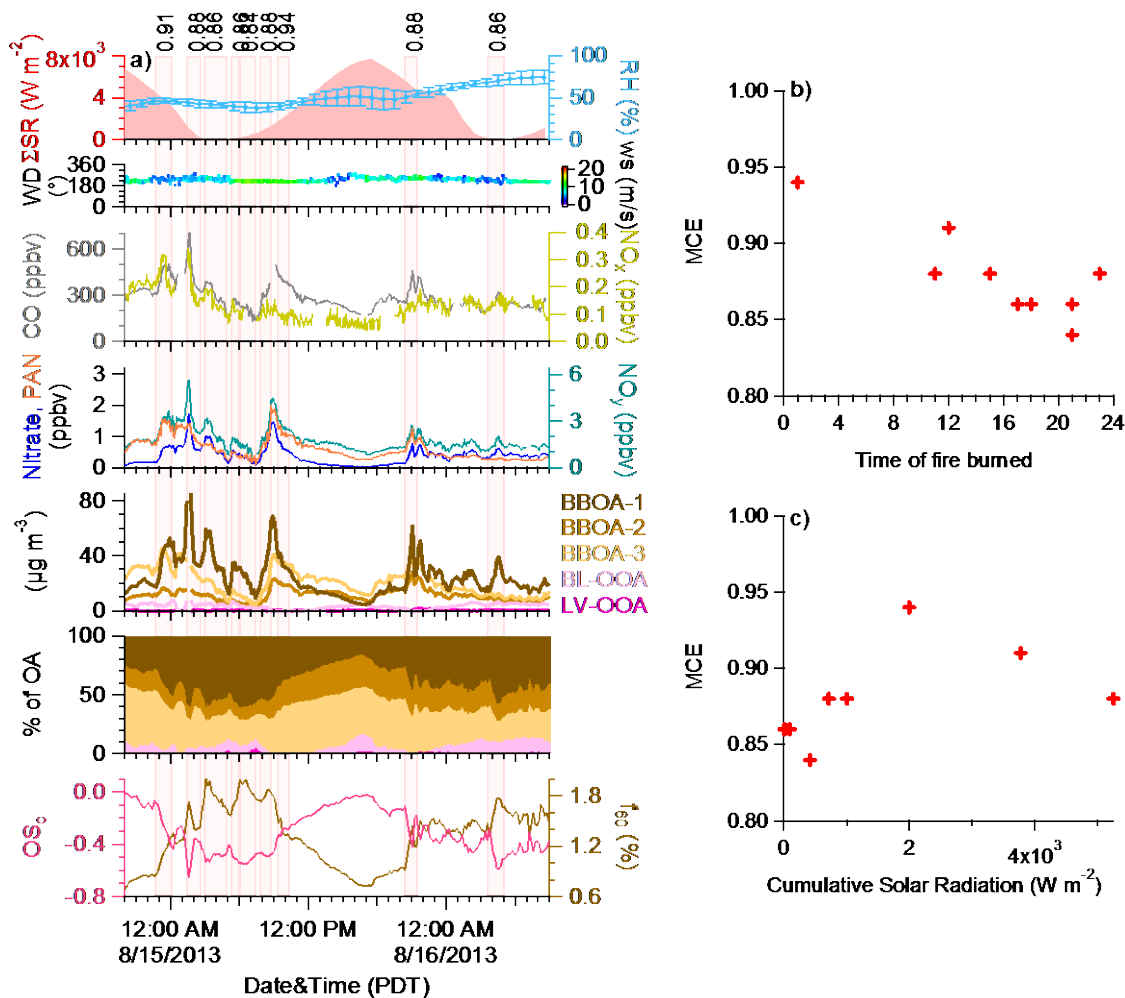

93  
 94 **Fig. S13.** (a) The overview plot for the Salmon River Complex Fire Case Study (the right panel of Fig. 6) with 9  
 95 events calculated for modified combustion efficiency (MCE) highlighted. The numbers on the top are MCE values.  
 96 (b) MCE values versus time of fire burned, and (c) MCE values versus Cumulative Solar Radiation for these 9  
 97 events.

98 **Reference**

99 Sun, Y. L., Zhang, Q., Schwab, J. J., Yang, T., Ng, N. L., and Demerjian, K. L.: Factor analysis of combined organic  
100 and inorganic aerosol mass spectra from high resolution aerosol mass spectrometer measurements, *Atmospheric*  
101 *Chemistry and Physics*, 12, 8537-8551, 2012.

102 Zhang, Q., Jimenez, J. L., Canagaratna, M. R., Ulbrich, I. M., Ng, N. L., Worsnop, D. R., and Sun, Y. L.:  
103 Understanding atmospheric organic aerosols via factor analysis of aerosol mass spectrometry: a review, *Anal.*  
104 *Bioanal. Chem.*, 401, 3045-3067, 2011.

105
